# Supplementary material for: Mechanistic in situ investigation of heterogeneous hydrogenation over Rh/TiO2 catalysts: selectivity, pairwise route and catalyst nature
Source: Royal Society of Chemistry journal article supplement (doi:10.1039/c9fd00138g), 2020-01-30
Supplement: c9fd00138g1.pdf [file c9fd00138g1.pdf]

## SUPPORTING INFORMATION

### **Mechanistic in situ investigation of heterogeneous hydrogenation over Rh/TiO<sub>2</sub> catalysts: selectivity, pairwise route, catalysts nature**

Ekaterina V. Pokochueva,<sup>a,c</sup> Dudari B. Burueva,<sup>a,c</sup> Larisa M. Kovtunova,<sup>b,c</sup> Andrey V. Bukhtiyarov,<sup>b,c</sup>  
Alexei Yu. Gladky,<sup>b</sup> Kirill V. Kovtunov,<sup>a,†</sup> Igor V. Koptug,<sup>a,b,c</sup> Valerii I. Bukhtiyarov<sup>b,†</sup>

<sup>a</sup>Laboratory of Magnetic Resonance Microimaging, International Tomography Center SB RAS, 3A Institutskaya St.,  
630090 Novosibirsk, Russia

<sup>b</sup>Boriskov Institute of Catalysis SB RAS, 5 Acad. Lavrentiev Ave, 630090 Novosibirsk, Russia

<sup>c</sup>Novosibirsk State University, 2 Pirogova St., 630090 Novosibirsk, Russia

† Corresponding authors, e-mails: kovtunov@tomo.nsc.ru, vib@catalysis.ru

## **TABLE OF CONTENT**

|                                     |   |
|-------------------------------------|---|
| Catalyst preparation procedure..... | 3 |
| Additional tables .....             | 4 |
| References .....                    | 6 |

## Catalyst preparation procedure

In total, two series of the Rh/TiO<sub>2</sub> catalysts were prepared with the variation of several different preparation parameters. Titanium dioxide (Hombifine N, S<sub>BET</sub>=103 m<sup>2</sup>/g) was used as the support. The TiO<sub>2</sub> samples were calcined at 550 °C for 2 h prior to use and then dried at 120 °C for 6 h. Rhodium (III) nitrate (or acetate) solution was prepared by the dissolution of rhodium (III) hydroxide in the necessary amount of nitric (or acetic) acid. For the preparation of rhodium (III) hydroxide, 20 mL of 8.4M sodium hydroxide solution was added to 20 mL of 1.2M rhodium (III) chloride solution. The obtained mixture was heated while stirring until the complete change of solution color from red to light yellow, and then the reaction mixture was acidified to pH of 11. The formed precipitate of rhodium (III) hydroxide was washed to complete removal of Cl<sup>-</sup> ions and then dissolved in the required amount of nitric or acetic acid. Precise rhodium content in the prepared catalysts was determined by X-ray fluorescence (XRF); the found values are presented in Table S1.

In the first set, the precursor solution was varied. Two catalysts were prepared by incipient impregnation (0.8 mL/g) of dry TiO<sub>2</sub> by the calculated amount of rhodium nitrate or acetate solution. The reactants were mixed thoroughly till wetted state and were left in air for 24 h. The materials were then dried in air at 120 °C for 3 h, and calcination of the impregnated support in the air at 600 °C for 2 h followed by the reduction in H<sub>2</sub> flow at 330 °C for 3 h finalized the preparation procedure. For the third catalyst, binuclear acetic rhodium (II) complex [Rh<sub>2</sub>(OAc)<sub>4</sub>] (preparation procedure is described in ref.<sup>1</sup>) was used as the precursor. The catalyst was prepared by incipient impregnation of dry TiO<sub>2</sub> with [Rh<sub>2</sub>(OAc)<sub>4</sub>] solution in ethanol, then the solvent excess was evaporated at 40 °C at reduced pressure. The subsequent calcination/reduction treatment was the same as described above.

In the second series, the temperature of calcination was varied. The general preparation procedure is identical to the procedure described above for the catalyst prepared from Rh(NO<sub>3</sub>)<sub>3</sub>, except for the final calcination stage – samples were either dried in an argon flow at 120 °C for 3 h (referred to as the catalyst prepared without calcination) or calcined in air at 400 °C for 4 h or at 500 °C for 3 h or at 600 °C for 2 h.

**Table S1.** Rh content in the prepared catalysts determined by X-ray fluorescence analysis

| Varied parameter        | Parameter                             | Rh content, % |
|-------------------------|---------------------------------------|---------------|
| Precursor solution      | Rh(NO <sub>3</sub> ) <sub>3</sub> *   | 1.01%*        |
|                         | Rh(OAc) <sub>3</sub>                  | 0.97%         |
|                         | [Rh <sub>2</sub> (OAc) <sub>4</sub> ] | 1.03%         |
| Calcination temperature | No calcination                        | 1.01%         |
|                         | 400 °C                                | 1.01%         |
|                         | 500 °C                                | 1.01%         |
|                         | 600 °C*                               | 1.01%*        |

\* denote the same catalysts

## Additional tables

**Table S2.** Correction coefficients  $C$  used for calculation of the 'true' intensity of the signals at high gas flow rates.

| <b>Substrate</b>                  | <b><math>C</math></b> |
|-----------------------------------|-----------------------|
| 1,3-butadiene and butane          | 2.59                  |
| propylene, CH-group               | 2.67                  |
| propylene, CH <sub>2</sub> -group | 2.65                  |
| propylene, CH <sub>3</sub> -group | 1.83                  |
| propane, CH <sub>2</sub> -group   | 1.92                  |
| propane, CH <sub>3</sub> -group   | 2.07                  |

**Table S3.** Weight amount of rhodium and atomic ratio of elements calculated from XPS data

| Varied parameter            | Parameter                             | Rh, wt. % |                                                                                   |                                                                                   |                                                                                   | Rh/Ti  |                                                                                     |                                                                                     |                                                                                     | C/Ti   |                                                                                     |                                                                                     |                                                                                     | O/Ti   |                                                                                     |                                                                                     |                                                                                     |
|-----------------------------|---------------------------------------|-----------|-----------------------------------------------------------------------------------|-----------------------------------------------------------------------------------|-----------------------------------------------------------------------------------|--------|-------------------------------------------------------------------------------------|-------------------------------------------------------------------------------------|-------------------------------------------------------------------------------------|--------|-------------------------------------------------------------------------------------|-------------------------------------------------------------------------------------|-------------------------------------------------------------------------------------|--------|-------------------------------------------------------------------------------------|-------------------------------------------------------------------------------------|-------------------------------------------------------------------------------------|
|                             |                                       | before    |  |  |  | before |  |  |  | before |  |  |  | before |  |  |  |
| Precursor                   | Rh(NO <sub>3</sub> ) <sub>3</sub> *   | 1.72      | 2.12                                                                              | 2.03                                                                              | 2.13                                                                              | 0.025  | 0.023                                                                               | 0.023                                                                               | 0.023                                                                               | 1.096  | 1.576                                                                               | 2.058                                                                               | 1.389                                                                               | 2.395  | 2.770                                                                               | 2.703                                                                               | 2.739                                                                               |
|                             | Rh(OAc) <sub>3</sub>                  | 0.94      | 1.46                                                                              | 1.30                                                                              | 1.30                                                                              | 0.009  | 0.016                                                                               | 0.014                                                                               | 0.014                                                                               | 1.287  | 1.854                                                                               | 1.768                                                                               | 1.446                                                                               | 2.350  | 2.620                                                                               | 2.615                                                                               | 2.598                                                                               |
|                             | [Rh <sub>2</sub> (OAc) <sub>4</sub> ] | 1.37      | –                                                                                 | 0.90                                                                              | 0.90                                                                              | 0.016  | –                                                                                   | 0.010                                                                               | 0.009                                                                               | 2.116  | –                                                                                   | 1.847                                                                               | 1.404                                                                               | 2.703  | –                                                                                   | 2.625                                                                               | 2.578                                                                               |
| Calcination temperature, °C | without                               | 2.18      | –                                                                                 | 2.12                                                                              | –                                                                                 | 0.022  | –                                                                                   | 0.025                                                                               | –                                                                                   | 1.313  | –                                                                                   | 2.240                                                                               | –                                                                                   | 2.412  | –                                                                                   | 2.722                                                                               | –                                                                                   |
|                             | 400                                   | 2.44      | –                                                                                 | 2.36                                                                              | –                                                                                 | 0.025  | –                                                                                   | 0.027                                                                               | –                                                                                   | 1.478  | –                                                                                   | 1.782                                                                               | –                                                                                   | 2.410  | –                                                                                   | 2.766                                                                               | –                                                                                   |
|                             | 500                                   | 1.81      | –                                                                                 | 2.19                                                                              | –                                                                                 | 0.018  | –                                                                                   | 0.025                                                                               | –                                                                                   | 1.260  | –                                                                                   | 2.196                                                                               | –                                                                                   | 2.416  | –                                                                                   | 2.655                                                                               | –                                                                                   |
|                             | 600*                                  | 1.72      | 2.12                                                                              | 2.03                                                                              | 2.13                                                                              | 0.017  | 0.023                                                                               | 0.023                                                                               | 0.023                                                                               | 1.096  | 1.576                                                                               | 2.058                                                                               | 1.389                                                                               | 2.395  | 2.770                                                                               | 2.703                                                                               | 2.739                                                                               |

\* denotes the same catalysts

## References

- (1) Drago, R. S.; Cosmano, R.; Telser, J. EPR Spectra and Bonding in the 2:1 Base Adducts of  $\text{Rh}_2(\text{Carboxylate})_4^+$ . *Inorg. Chem.* **1984**, *23*, 3120–3124.
